# Supplementary material for: QUADRatlas: the RNA G-quadruplex and RG4-binding proteins database
Source: PubMed Central journal article supplement (PMC9825518; doi:10.1093/nar/gkac782), 2022-09-16
Supplement: gkac782_supplemental_file.pdf [file gkac782_supplemental_file.pdf]

# Supplementary Figure 1

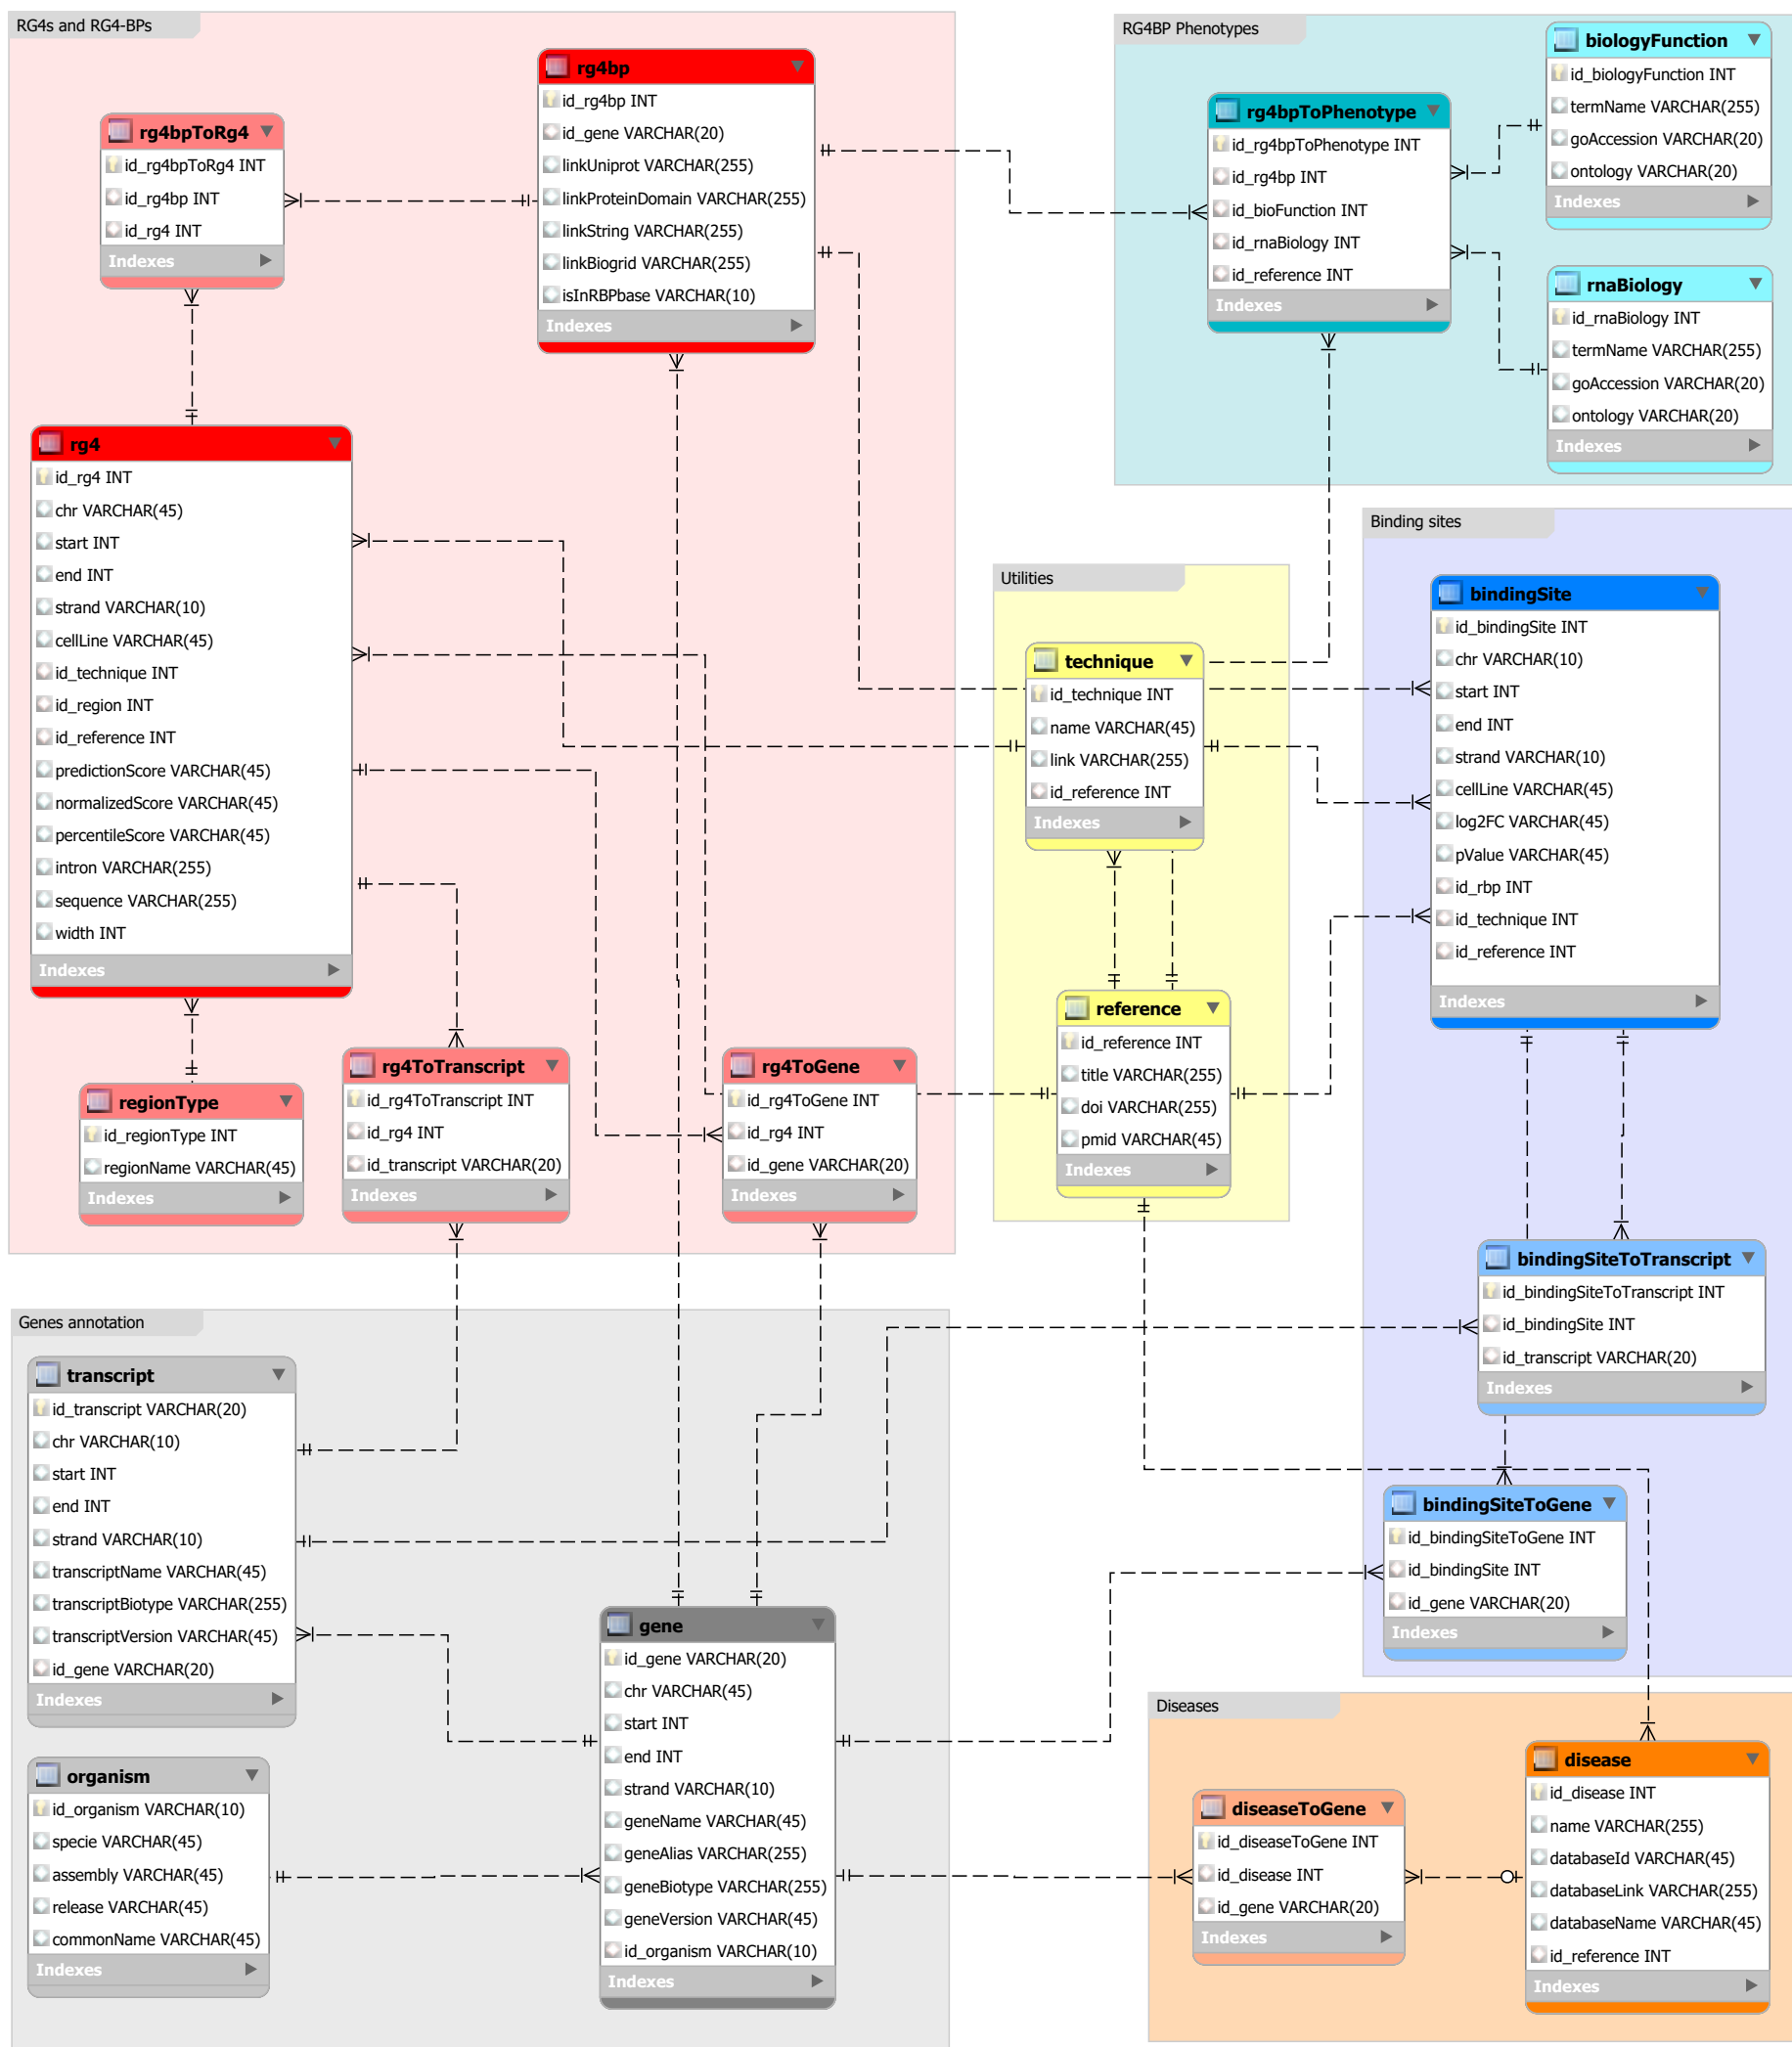

## Supplementary figure legends

**Supplementary Figure 1: Schema of the QUADAtlas database.** *The figure shows the schema of the PostgreSQL database containing QUADAtlas data. The different parts of the model are grouped and color-coded according to the type of data they represent.*
